# Supplementary material
Source: PubMed Central journal article supplement (PMC4976030)
Supplement: NIHMS796845-supplement-1.pdf [file NIHMS796845-supplement-1.pdf]

## Supplemental Figures

### **Group 2 Innate Lymphoid Cells Promote An Early Antibody Response To A Respiratory Antigen In Mice**

Running Title: B cell regulation by ILC2

Li Yin Drake<sup>\*</sup>, Koji Iijima<sup>\*</sup>, Kathleen Bartemes<sup>\*</sup>, and Hirohito Kita<sup>†</sup>

<sup>\*</sup>Division of Allergic Diseases and Department of Medicine, Mayo Clinic, 200 First Street SW, Rochester, MN 55905; <sup>†</sup> Division of Allergic Diseases, Department of Medicine, and Department of Immunology, Mayo Clinic, 200 First Street SW, Rochester, MN 55905

Corresponding author: Hirohito Kita, M.D. Departments of Medicine and Immunology, Mayo Clinic, 200 First Street SW, Rochester, MN 55905. E-mail: [kita.hirohito@mayo.edu](mailto:kita.hirohito@mayo.edu). Phone: (507) 284-6109, FAX: (507) 284-5045

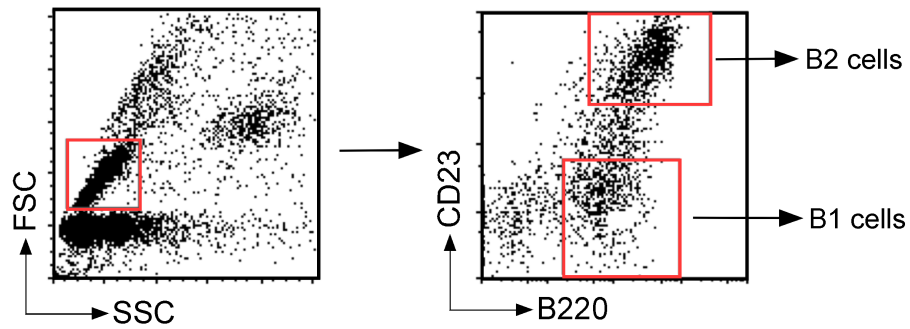

Supplemental Figure 1

**SUPPLEMENTAL FIGURE 1.** Gating strategy for B1 and B2 cell sorting. Peritoneal lavage cells were collected from naïve BALB/c mice and stained with anti-CD23 and anti-B220 antibodies. Lymphocytes were gated on forward scatter and side scatter as shown in the left panel. B1 cells ( $B220^{\text{low}}CD23^{-}$ ) and B2 cells ( $B220^{\text{high}}CD23^{\text{high}}$ ) were gated as shown in the right panel.

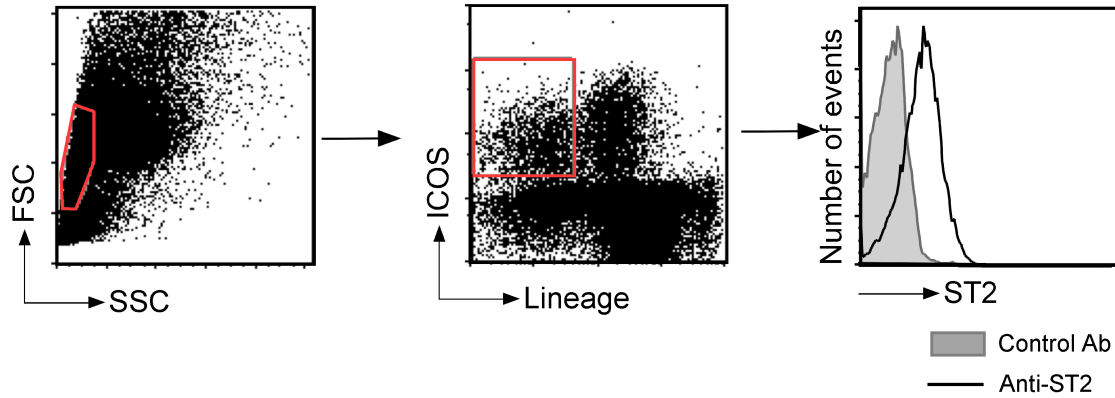

Supplemental Figure 2

**SUPPLEMENTAL FIGURE 2.** Gating strategy and ST2 staining of lung ILC2s.

C57BL/6 mice were i.p. injected with IL-33 and IL-25 (400 ng/mouse) daily for 4 days to expand ILC2s *in vivo*. Lungs were collected, and single cell suspensions were made as described in the Materials and Methods. Cells were stained with fluorescence-labeled antibodies to lineage markers (CD3, CD14, CD11b, CD16/CD32 and B220), CD278 (ICOS) and ST2. Lymphocytes were gated as shown in the left panel. Lung ILC2s were identified as the Lin<sup>-</sup>ICOS<sup>+</sup> cell population as shown in the middle panel. ST2 staining in the Lin<sup>-</sup>ICOS<sup>+</sup> cell population is shown in the right panel. Gray-filled area, control Ab; black line, anti-ST2 Ab.

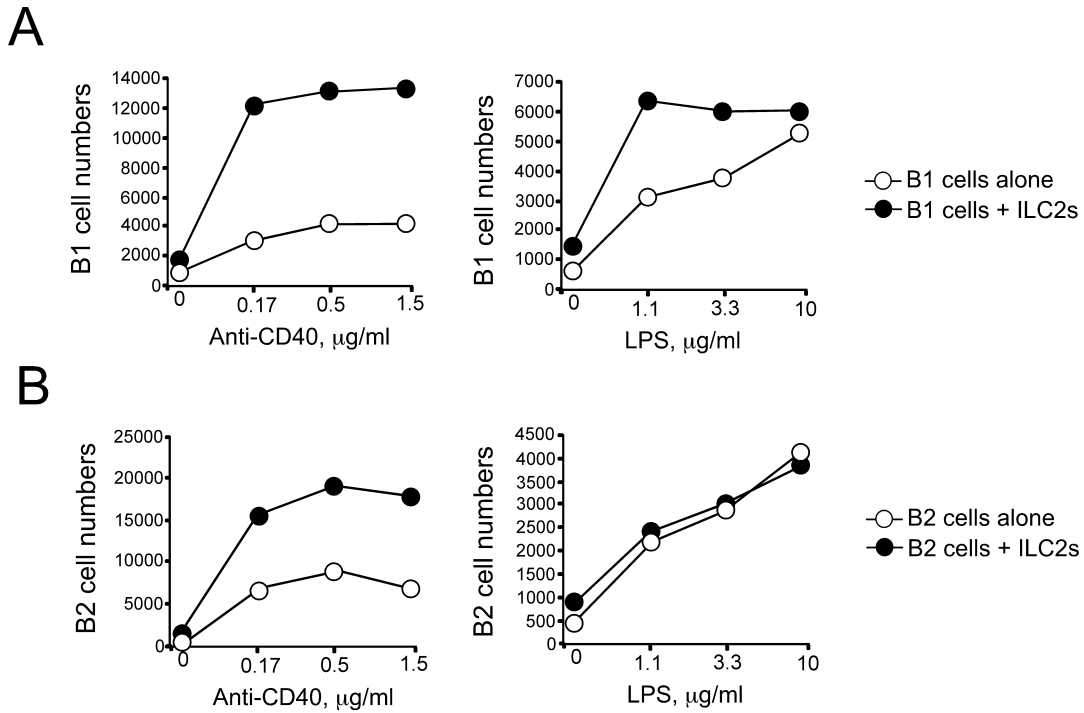

Supplemental Figure 3

**SUPPLEMENTAL FIGURE 3.** Lung ILC2s enhance the proliferation of B lymphocytes. Lung ILC2s and peritoneal B cells were isolated from naïve BALB/c mice. Peritoneal B1 cells and B2 cells were cultured at  $2 \times 10^4$  cells/well with or without ILC2s ( $10^4$  cells/well) in the presence of serial dilutions of anti-CD40 antibody or LPS plus IL-4 (10 ng/ml) for 4 days. The number of B220<sup>+</sup> cells was determined by FACS. Each data point represents the cell numbers from one well. Data are representative of two independent experiments.

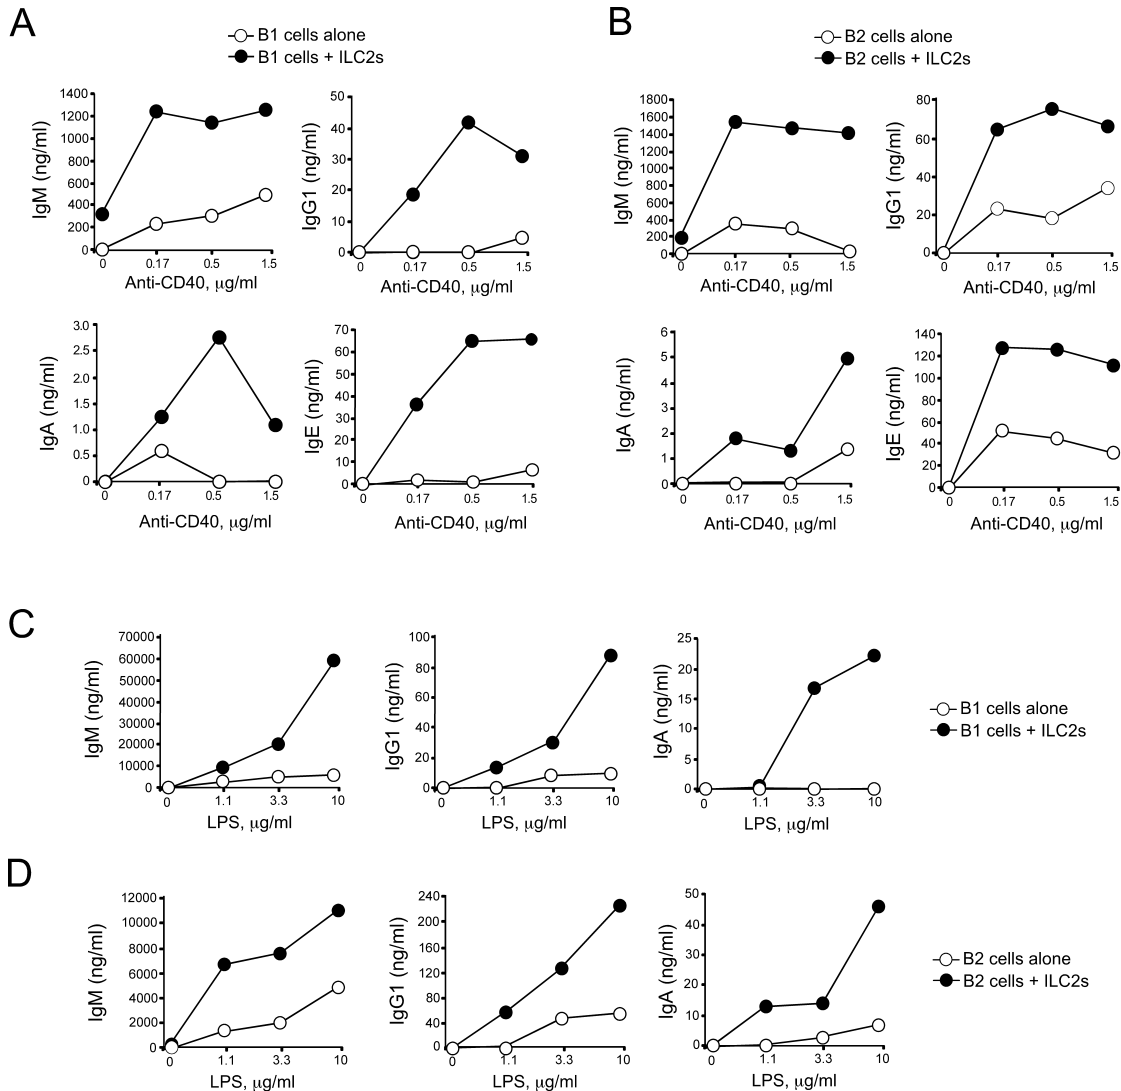

Supplemental Figure 4

**SUPPLEMENTAL FIGURE 4.** Lung ILC2s enhance Ig production by B1 and B2 cells.

Lung ILC2s and peritoneal B1 and B2 cells were isolated from BALB/c mice. B1 cells (Panels A and C) and B2 cells (Panels B and D) were cultured at  $2 \times 10^4$  cells/well with or without ILC2s ( $10^4$  cells/well) in the presence of serial dilutions of anti-CD40 or LPS plus IL-4 for 4 days. Ig levels in the supernatants were analyzed by ELISA. Each data point represents the Ig concentration from one well. Data are representative of three independent experiments

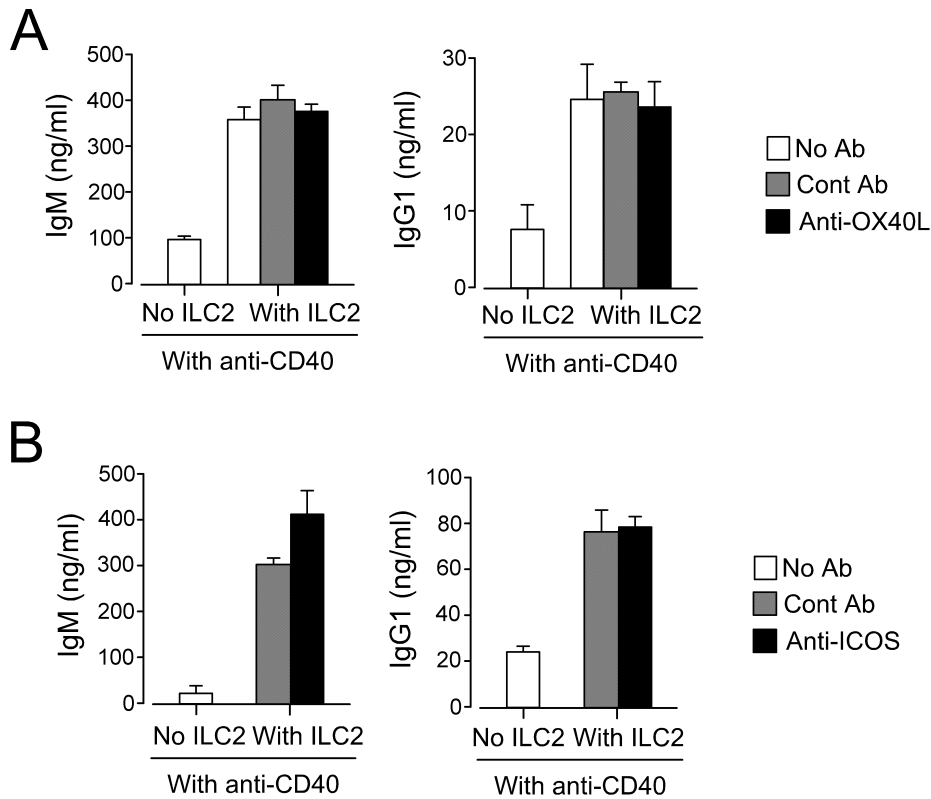

Supplemental Figure 5

**SUPPLEMENTAL FIGURE 5.** ILC2s enhance B cell antibody production independent of OX40/OX40L and ICOS/ICOSL interaction. Lung ILC2s and splenic B cells were isolated from BALB/c mice. B cells were stimulated with anti-CD40 (1.5  $\mu\text{g/ml}$ ) plus IL-4 with or without ILC2s for 4 days. Anti-OX40L (2  $\mu\text{g/ml}$ ) (Panel A), anti-ICOS (2  $\mu\text{g/ml}$ ) (Panel B) or corresponding control Abs were added to some groups. Data (mean $\pm$ SEM, n=3) are representative of three independent experiments.
